# Supplementary material for: The relative contribution of COVID-19 infection versus COVID-19 related occupational stressors to insomnia in healthcare workers
Source: bioRxiv or medRxiv preprint supplement (doi:10.1101/2022.10.27.22281582), 2022-10-30
Supplement: Supplementary file [file media-1.pdf]

Supplemental Materials: Details of statistical regression models

(1) Models addressing relationship of insomnia as measured by the ISI to various outcomes, as described in text:

a) Model relating sleep to occupational functioning:

Generalized least squares fit by REML

Model: work ~ isi\_total + age + gender

| <b>AIC</b> | <b>BIC</b> | <b>logLik</b> |
|------------|------------|---------------|
| 6160.261   | 6192.799   | -3074.131     |

Correlation Structure: AR(1)

Formula: ~1 | PtID

Parameter estimate(s):

| <b>Phi</b>       |
|------------------|
| <b>0.6263705</b> |

Coefficients:

|                    | <b>Value</b> | <b>Std. Error</b> | <b>t-value</b> | <b>p-value</b> |
|--------------------|--------------|-------------------|----------------|----------------|
| <b>(Intercept)</b> | 2.2535563    | 0.12275909        | 28.359910      | 0.0000         |
| <b>ISI Total</b>   | 0.0909617    | 0.00867815        | 10.481693      | 0.0000         |
| <b>age</b>         | -0.0961472   | 0.07137116        | -1.347144      | 0.1781         |
| <b>gender</b>      | 0.1531653    | 0.10542437        | 1.452846       | 0.1465         |

|                                |            |               |
|--------------------------------|------------|---------------|
| <b>Residual Standard Error</b> | 1.819436   |               |
| <b>Degrees of Freedom</b>      | 1678 total | 1674 residual |

b) Model relating sleep to self-reported likelihood of leaving current field:

Generalized least squares fit by REML

Model: infield ~ isi\_total + age + gender

| <b>AIC</b> | <b>BIC</b> | <b>logLik</b> |
|------------|------------|---------------|
| 5527.824   | 5560.351   | -2757.912     |

Correlation Structure: AR(1)

Formula: ~1 | PtID

Parameter estimate(s):

|                  |
|------------------|
| <b>Phi</b>       |
| <b>0.7662417</b> |

Coefficients:

|                    | <b>Value</b> | <b>Std. Error</b> | <b>t-value</b> | <b>p-value</b> |
|--------------------|--------------|-------------------|----------------|----------------|
| <b>(Intercept)</b> | 3.253587     | 0.11472488        | 28.359910      | 0.0000         |
| <b>ISI Total</b>   | 0.050418     | 0.00734686        | 6.862578       | 0.0000         |
| <b>age</b>         | 0.211740     | 0.07631342        | 2.774610       | 0.0056         |
| <b>gender</b>      | 0.085483     | 0.11137435        | 0.767531       | 0.4429         |

|                                |            |               |
|--------------------------------|------------|---------------|
| <b>Residual Standard Error</b> | 1.750745   |               |
| <b>Degrees of Freedom</b>      | 1675 total | 1671 residual |

a) Model relating sleep to thoughts of suicide, self-harm, or being better off dead:

Generalized least squares fit by REML

Model: phq9i9 ~ isi\_total + age + gender

| <b>AIC</b> | <b>BIC</b> | <b>logLik</b> |
|------------|------------|---------------|
| 1060.662   | 1088.358   | -524.331      |

Correlation Structure: AR(1)

Formula: ~1 | PtID

Parameter estimate(s):

|                  |
|------------------|
| <b>Phi</b>       |
| <b>0.5447143</b> |

Coefficients:

|                    | <b>Value</b> | <b>Std. Error</b> | <b>t-value</b> | <b>p-value</b> |
|--------------------|--------------|-------------------|----------------|----------------|
| <b>(Intercept)</b> | -0.10044693  | 0.04722915        | -2.126799      | 0.0338         |
| <b>ISI Total</b>   | 0.02447273   | 0.00349304        | 7.006141       | 0.0000         |
| <b>age</b>         | -0.02131648  | 0.02412003        | -0.883767      | 0.3771         |
| <b>gender</b>      | 0.03231543   | 0.03481727        | 0.928144       | 0.3536         |

|                                |           |              |
|--------------------------------|-----------|--------------|
| <b>Residual Standard Error</b> | 0.5206405 |              |
| <b>Degrees of Freedom</b>      | 751 total | 747 residual |

(2) Core model addressing predictors of ISI from text:

Generalized least squares fit by REML

Model: ISI total score ~ Personal history of COVID-19 infection + Family member with COVID-19 infection + Past 2 weeks COVID-related occupational stressors + Peak COVID-related occupational stressors + age + gender

| AIC      | BIC      | logLik    |
|----------|----------|-----------|
| 9392.458 | 9441.313 | -4687.229 |

Correlation Structure: AR(1)

Formula: ~1 | PtID

Parameter estimate(s):

| Phi       |
|-----------|
| 0.7159753 |

Coefficients:

|                                                          | Value     | Std. Error | t-value   | p-value |
|----------------------------------------------------------|-----------|------------|-----------|---------|
| <b>(Intercept)</b>                                       | 9.726505  | 0.5120368  | 18.995716 | 0.0000  |
| <b>Personal history of COVID-19 infection</b>            | 0.692786  | 0.2236221  | 3.098021  | 0.0020  |
| <b>Family member with COVID-19 infection</b>             | -0.096676 | 0.2210195  | -0.437409 | 0.6619  |
| <b>Past 2 weeks COVID-related occupational stressors</b> | 1.704757  | 0.1402930  | 12.151402 | 0.0000  |
| <b>Peak COVID-related occupational stressors</b>         | 0.082858  | 0.0256810  | 3.226414  | 0.0013  |
| <b>Age</b>                                               | 0.014379  | 0.2163650  | 0.066459  | 0.9470  |
| <b>Gender</b>                                            | 0.559322  | 0.3131433  | 1.786152  | 0.0743  |

Correlation:

| (Intr) | PERSONAL HISTORY OF COVID-19 INFECTION | FAMILY MEMBER WITH COVID-19 INFECTION | Past 2 weeks COVID-related | PEAK COVID-19 RELATED OCCUPATIONAL STRESSORS | age |
|--------|----------------------------------------|---------------------------------------|----------------------------|----------------------------------------------|-----|
|--------|----------------------------------------|---------------------------------------|----------------------------|----------------------------------------------|-----|

|                                                          |        |        |        |                               |        |        |
|----------------------------------------------------------|--------|--------|--------|-------------------------------|--------|--------|
|                                                          |        |        |        | <b>occupational stressors</b> |        |        |
| <b>Personal history of COVID-19 infection</b>            | 0.170  |        |        |                               |        |        |
| <b>Family member with COVID-19 infection</b>             | 0.041  | -0.312 |        |                               |        |        |
| <b>Past 2 weeks COVID-related occupational stressors</b> | 0.328  | -0.014 | -0.036 |                               |        |        |
| <b>Peak COVID-related occupational stressors</b>         | -0.902 | -0.186 | -0.027 | -0.381                        |        |        |
| <b>age</b>                                               | -0.108 | 0.064  | -0.103 | 0.041                         | 0.120  |        |
| <b>gender</b>                                            | -0.069 | 0.025  | 0.000  | 0.015                         | -0.096 | -0.007 |

Standardized residuals:

| <b>Min</b>  | <b>Q1</b>   | <b>Med</b> | <b>Q3</b>  | <b>Max</b> |
|-------------|-------------|------------|------------|------------|
| -2.88856050 | -0.67696599 | 0.03740746 | 0.67985578 | 2.97731249 |

|                                |            |               |  |
|--------------------------------|------------|---------------|--|
| <b>Residual Standard Error</b> | 5.090767   |               |  |
| <b>Degrees of Freedom</b>      | 1690 total | 1683 residual |  |

(3) Models for Fig 1A top

> summary(fitisi)

Generalized least squares fit by REML

Model: ISI total score ~ Personal history of COVID-19 infection + Family member with COVID-19 infection + Past 2 weeks COVID-related occupational stressors + Peak COVID-related occupational stressors + age + gender

| <b>AIC</b> | <b>BIC</b> | <b>logLik</b> |
|------------|------------|---------------|
| 9392.458   | 9441.313   | -4687.229     |

Correlation Structure: AR(1)

Formula: ~1 | PtID

Parameter estimate(s):

|                  |
|------------------|
| <b>Phi</b>       |
| <b>0.7159753</b> |

Coefficients:

|                                                          | <b>Value</b> | <b>Std.Error</b> | <b>t-value</b> | <b>p-value</b> |
|----------------------------------------------------------|--------------|------------------|----------------|----------------|
| <b>(Intercept)</b>                                       | 9.726505     | 0.5120368        | 18.995716      | 0.0000         |
| <b>Personal history of COVID-19 infection</b>            | 0.692786     | 0.2236221        | 3.098021       | 0.0020         |
| <b>Family member with COVID-19 infection</b>             | -0.096676    | 0.2210195        | -0.437409      | 0.6619         |
| <b>Past 2 weeks COVID-related occupational stressors</b> | 1.704757     | 0.1402930        | 12.151402      | 0.0000         |
| <b>Peak COVID-related occupational stressors</b>         | 0.082858     | 0.0256810        | 3.226414       | 0.0013         |
| <b>age</b>                                               | 0.014379     | 0.2163650        | 0.066459       | 0.9470         |
| <b>gender</b>                                            | 0.559322     | 0.3131433        | 1.786152       | 0.0743         |

Correlation:

|                                                          | <b>(Intr)</b> | <b>PERSONAL HISTORY OF COVID-19 INFECTION</b> | <b>FAMILY MEMBER WITH COVID-19 INFECTION</b> | <b>Past 2 weeks COVID-related occupational stressors</b> | <b>PEAK COVID-19 RELATED OCCUPATIONAL STRESSORS</b> | <b>age</b> |
|----------------------------------------------------------|---------------|-----------------------------------------------|----------------------------------------------|----------------------------------------------------------|-----------------------------------------------------|------------|
| <b>Personal history of COVID-19 infection</b>            | 0.170         |                                               |                                              |                                                          |                                                     |            |
| <b>Family member with COVID-19 infection</b>             | 0.041         | -0.312                                        |                                              |                                                          |                                                     |            |
| <b>Past 2 weeks COVID-related occupational stressors</b> | 0.328         | -0.014                                        | -0.036                                       |                                                          |                                                     |            |
| <b>Peak COVID-related occupational stressors</b>         | -0.902        | -0.186                                        | -0.027                                       | -0.381                                                   |                                                     |            |

|               |        |       |        |       |        |        |
|---------------|--------|-------|--------|-------|--------|--------|
| <b>age</b>    | -0.108 | 0.064 | -0.103 | 0.041 | 0.120  |        |
| <b>gender</b> | -0.069 | 0.025 | 0.000  | 0.015 | -0.096 | -0.007 |

Standardized residuals:

| <b>Min</b>  | <b>Q1</b>   | <b>Med</b> | <b>Q3</b>  | <b>Max</b> |
|-------------|-------------|------------|------------|------------|
| -2.88856050 | -0.67696599 | 0.03740746 | 0.67985578 | 2.97731249 |

|                                |            |               |
|--------------------------------|------------|---------------|
| <b>Residual standard error</b> | 5.090767   |               |
| <b>Degrees of freedom</b>      | 1690 total | 1683 residual |

> summary(fitpcl)

Generalized least squares fit by REML

Model: pcl5total ~ Personal history of COVID-19 infection + Family member with COVID-19 infection + Past 2 weeks COVID-related occupational stressors + Peak COVID-related occupational stressors + age + gender

Data: data2use

| <b>AIC</b> | <b>BIC</b> | <b>logLik</b> |
|------------|------------|---------------|
| 12382.31   | 12430.92   | -6182.157     |

Correlation Structure: AR(1)

Formula: ~1 | PtID

Parameter estimate(s):

|                 |
|-----------------|
| <b>Phi</b>      |
| <b>0.738682</b> |

Coefficients:

|                                                          | <b>Value</b> | <b>Std. Error</b> | <b>t-value</b> | <b>p-value</b> |
|----------------------------------------------------------|--------------|-------------------|----------------|----------------|
| <b>Intercept</b>                                         | 17.113036    | 1.4329872         | 11.942211      | 0.0000         |
| <b>Personal history of COVID-19 infection</b>            | 1.307692     | 0.6287211         | 2.079924       | 0.0377         |
| <b>Family member with COVID-19 infection</b>             | 0.379777     | 0.6227244         | 0.609864       | 0.5420         |
| <b>Past 2 weeks COVID-related occupational stressors</b> | 6.857538     | 0.3801570         | 18.038703      | 0.0000         |

|                                                  |           |           |           |        |
|--------------------------------------------------|-----------|-----------|-----------|--------|
| <b>Peak COVID-related occupational stressors</b> | 0.407807  | 0.0716705 | 5.690021  | 0.0000 |
| <b>age</b>                                       | -1.779545 | 0.6111902 | -2.911606 | 0.0036 |
| <b>gender</b>                                    | 0.192778  | 0.8780037 | 0.219563  | 0.8262 |

Correlation:

|                                                          | (Intr) | <b>PERSONAL HISTORY OF COVID-19 INFECTION</b> | <b>FAMILY MEMBER WITH COVID-19 INFECTION</b> | <b>Past 2 weeks COVID-related occupational stressors</b> | <b>PEAK COVID-19 RELATED OCCUPATIONAL STRESSORS</b> | <b>age</b> |
|----------------------------------------------------------|--------|-----------------------------------------------|----------------------------------------------|----------------------------------------------------------|-----------------------------------------------------|------------|
| <b>Personal history of COVID-19 infection</b>            | 0.169  |                                               |                                              |                                                          |                                                     |            |
| <b>Family member with COVID-19 infection</b>             | 0.046  | -0.308                                        |                                              |                                                          |                                                     |            |
| <b>Past 2 weeks COVID-related occupational stressors</b> | 0.315  | -0.012                                        | -0.031                                       |                                                          |                                                     |            |
| <b>Peak COVID-related occupational stressors</b>         | -0.900 | -0.186                                        | -0.031                                       | -0.370                                                   |                                                     |            |
| <b>age</b>                                               | -0.106 | 0.061                                         | -0.105                                       | 0.036                                                    | 0.119                                               |            |
| <b>gender</b>                                            | -0.068 | 0.024                                         | 0.001                                        | 0.014                                                    | -0.096                                              | -0.012     |

Standardized residuals:

| <b>Min</b> | <b>Q1</b>  | <b>Med</b> | <b>Q3</b> | <b>Max</b> |
|------------|------------|------------|-----------|------------|
| -2.4462126 | -0.6925527 | -0.1903986 | 0.5415783 | 4.3297910  |

|                                |            |               |  |
|--------------------------------|------------|---------------|--|
| <b>Residual Standard Error</b> | 14.05411   |               |  |
| <b>Degrees of Freedom</b>      | 1644 total | 1637 residual |  |

(4) Models for Fig1A bottom

> summary(fitF1)

Generalized least squares fit by REML

Model: mhsmall3f\_1 ~ Personal history of COVID-19 infection + Family member with COVID-19 infection + Past 2 weeks COVID-related occupational stressors + Peak COVID-related occupational stressors + age + gender

Data: data2use

| AIC     | BIC      | logLik   |
|---------|----------|----------|
| 4140.04 | 4188.602 | -2061.02 |

Correlation Structure: AR(1)

Formula: ~1 | PtID

Parameter estimate(s):

| Phi       |
|-----------|
| 0.6597996 |

Coefficients:

|                                                          | Value      | Std. Error | t-value   | p-value |
|----------------------------------------------------------|------------|------------|-----------|---------|
| <b>Intercept</b>                                         | 0.8688129  | 0.10431685 | 8.328596  | 0.0000  |
| <b>Personal history of COVID-19 infection</b>            | 0.0724225  | 0.04499485 | 1.609573  | 0.1077  |
| <b>Family member with COVID-19 infection</b>             | 0.0134383  | 0.04430643 | 0.303303  | 0.7617  |
| <b>Past 2 weeks COVID-related occupational stressors</b> | 0.3346461  | 0.03159189 | 10.592786 | 0.0000  |
| <b>Peak COVID-related occupational stressors</b>         | 0.0146770  | 0.00525709 | 2.791850  | 0.0053  |
| <b>age</b>                                               | -0.0992555 | 0.04316311 | -2.299545 | 0.0216  |
| <b>gender</b>                                            | -0.0071763 | 0.06226016 | -0.115263 | 0.9083  |

Correlation:



|                                                   | (Intr) | PERSONAL HISTORY OF COVID-19 INFECTION | FAMILY MEMBER WITH COVID-19 INFECTION | Past 2 weeks COVID-related occupational stressors | PEAK COVID-19 RELATED OCCUPATIONAL STRESSORS | age   |
|---------------------------------------------------|--------|----------------------------------------|---------------------------------------|---------------------------------------------------|----------------------------------------------|-------|
| Personal history of COVID-19 infection            | 0.177  |                                        |                                       |                                                   |                                              |       |
| Family member with COVID-19 infection             | 0.037  | -0.306                                 |                                       |                                                   |                                              |       |
| Past 2 weeks COVID-related occupational stressors | 0.367  | -0.014                                 | -0.039                                |                                                   |                                              |       |
| Peak COVID-related occupational stressors         | -0.906 | -0.189                                 | -0.020                                | -0.417                                            |                                              |       |
| age                                               | -0.106 | 0.064                                  | -0.112                                | 0.043                                             | 0.111                                        |       |
| gender                                            | -0.062 | 0.030                                  | 0.000                                 | 0.019                                             | -0.099                                       | 0.004 |

Standardized residuals:

| Min        | Q1         | Med        | Q3        | Max       |
|------------|------------|------------|-----------|-----------|
| -3.1839267 | -0.7271638 | -0.1886885 | 0.5096133 | 3.7781573 |

|                                |            |               |  |
|--------------------------------|------------|---------------|--|
| <b>Residual Standard Error</b> | 1.049544   |               |  |
| <b>Degrees of Freedom</b>      | 1636 total | 1629 residual |  |

> summary(fitF2)

Generalized least squares fit by REML

Model: mhsmall3f\_2 ~ Personal history of COVID-19 infection + Family member with COVID-19 infection + Past 2 weeks COVID-related occupational stressors + Peak COVID-related occupational stressors + age + gender

Data: data2use

| AIC             | BIC      | logLik    |
|-----------------|----------|-----------|
| <b>4051.473</b> | 4100.035 | -2016.737 |

Correlation Structure: AR(1)

Formula: ~1 | PtID

Parameter estimate(s):

|                  |
|------------------|
| <b>Phi</b>       |
| <b>0.6101749</b> |

Coefficients:

|                                                          | <b>Value</b> | <b>Std. Error</b> | <b>t-value</b> | <b>p-value</b> |
|----------------------------------------------------------|--------------|-------------------|----------------|----------------|
| <b>Intercept</b>                                         | 0.03333596   | 0.09584669        | 0.347805       | 0.7280         |
| <b>Personal history of COVID-19 infection</b>            | 0.00219464   | 0.04090616        | 0.053651       | 0.9572         |
| <b>Family member with COVID-19 infection</b>             | 0.04240595   | 0.04014654        | 1.056279       | 0.2910         |
| <b>Past 2 weeks COVID-related occupational stressors</b> | 0.26250679   | 0.03102805        | 8.460306       | 0.0000         |
| <b>Peak COVID-related occupational stressors</b>         | 0.02437243   | 0.00484542        | 5.029998       | 0.0000         |
| <b>age</b>                                               | -0.10231473  | 0.03897661        | -2.625029      | 0.0087         |
| <b>gender</b>                                            | -0.04428009  | 0.05635074        | -0.785794      | 0.4321         |

Correlation:

|                                                          | <b>(Intr)</b> | <b>PERSONAL HISTORY OF COVID-19 INFECTION</b> | <b>FAMILY MEMBER WITH COVID-19 INFECTION</b> | <b>Past 2 weeks COVID-related occupational stressors</b> | <b>PEAK COVID-19 RELATED OCCUPATIONAL STRESSORS</b> | <b>age</b> |
|----------------------------------------------------------|---------------|-----------------------------------------------|----------------------------------------------|----------------------------------------------------------|-----------------------------------------------------|------------|
| <b>Personal history of COVID-19 infection</b>            | 0.181         |                                               |                                              |                                                          |                                                     |            |
| <b>Family member with COVID-19 infection</b>             | 0.032         | -0.308                                        |                                              |                                                          |                                                     |            |
| <b>Past 2 weeks COVID-related occupational stressors</b> | 0.396         | -0.015                                        | -0.044                                       |                                                          |                                                     |            |
| <b>Peak COVID-related</b>                                | -0.909        | -0.191                                        | -0.014                                       | -0.443                                                   |                                                     |            |

|                               |        |       |        |       |        |       |
|-------------------------------|--------|-------|--------|-------|--------|-------|
| <b>occupational stressors</b> |        |       |        |       |        |       |
| <b>age</b>                    | -0.105 | 0.065 | -0.116 | 0.047 | 0.106  |       |
| <b>gender</b>                 | -0.058 | 0.034 | -0.002 | 0.022 | -0.101 | 0.013 |

Standardized residuals:

|            |            |            |           |            |
|------------|------------|------------|-----------|------------|
| <b>Min</b> | <b>Q1</b>  | <b>Med</b> | <b>Q3</b> | <b>Max</b> |
| -3.4511443 | -0.6584667 | -0.1186989 | 0.5706452 | 4.0646472  |

|                                 |            |               |  |
|---------------------------------|------------|---------------|--|
| <b>Residual standard error:</b> | 0.9810603  |               |  |
| <b>Degrees of freedom:</b>      | 1636 total | 1629 residual |  |

> summary(fitF3)

Generalized least squares fit by REML

Model: mhsmall3f\_3 ~ Personal history of COVID-19 infection + Family member with COVID-19 infection + Past 2 weeks COVID-related occupational stressors + Peak COVID-related occupational stressors + age + gender

Data: data2use

|            |            |               |
|------------|------------|---------------|
| <b>AIC</b> | <b>BIC</b> | <b>logLik</b> |
| 3812.102   | 3860.664   | -1897.051     |

Correlation Structure: AR(1)

Formula: ~1 | PtID

Parameter estimate(s):

|                  |
|------------------|
| <b>Phi</b>       |
| <b>0.6789277</b> |

Coefficients:

|                                                          | <b>Value</b> | <b>Std.Error</b> | <b>t-value</b> | <b>p-value</b> |
|----------------------------------------------------------|--------------|------------------|----------------|----------------|
| <b>(Intercept)</b>                                       | 1.5813248    | 0.09662911       | 16.364891      | 0.0000         |
| <b>Personal history of COVID-19 infection</b>            | 0.1075206    | 0.04185497       | 2.568885       | 0.0103         |
| <b>Family member with COVID-19 infection</b>             | -0.0359708   | 0.04126998       | -0.871597      | 0.3836         |
| <b>Past 2 weeks COVID-related occupational stressors</b> | 0.2230959    | 0.02843435       | 7.846000       | 0.0000         |

|                                                  |           |            |          |        |
|--------------------------------------------------|-----------|------------|----------|--------|
| <b>Peak COVID-related occupational stressors</b> | 0.0065025 | 0.00486237 | 1.337318 | 0.1813 |
| <b>age</b>                                       | 0.0528811 | 0.04026294 | 1.313394 | 0.1892 |
| <b>gender</b>                                    | 0.1286761 | 0.05802223 | 2.217704 | 0.0267 |

Correlation:

|                                                          | (Intr) | <b>PERSONAL HISTORY OF COVID-19 INFECTION</b> | <b>FAMILY MEMBER WITH COVID-19 INFECTION</b> | <b>Past 2 weeks COVID-related occupational stressors</b> | <b>PEAK COVID-19 RELATED OCCUPATIONAL STRESSORS</b> | <b>age</b> |
|----------------------------------------------------------|--------|-----------------------------------------------|----------------------------------------------|----------------------------------------------------------|-----------------------------------------------------|------------|
| <b>Personal history of COVID-19 infection</b>            | 0.175  |                                               |                                              |                                                          |                                                     |            |
| <b>Family member with COVID-19 infection</b>             | 0.039  | -0.306                                        |                                              |                                                          |                                                     |            |
| <b>Past 2 weeks COVID-related occupational stressors</b> | 0.355  | -0.014                                        | -0.037                                       |                                                          |                                                     |            |
| <b>Peak COVID-related occupational stressors</b>         | -0.905 | -0.189                                        | -0.023                                       | -0.407                                                   |                                                     |            |
| <b>age</b>                                               | -0.106 | 0.063                                         | -0.110                                       | 0.041                                                    | 0.113                                               |            |
| <b>gender</b>                                            | -0.063 | 0.029                                         | 0.000                                        | 0.018                                                    | -0.098                                              | 0.000      |

Standardized residuals:

| <b>Min</b>  | <b>Q1</b>   | <b>Med</b> | <b>Q3</b>  | <b>Max</b> |
|-------------|-------------|------------|------------|------------|
| -3.26387164 | -0.68447668 | 0.08933059 | 0.70115020 | 3.09688658 |

|                                |            |               |  |
|--------------------------------|------------|---------------|--|
| <b>Residual standard error</b> | 0.9659589  |               |  |
| <b>Degrees of freedom</b>      | 1636 total | 1629 residual |  |
